# Supplementary material
Source: Springer Nature journal article supplement (https://www.springermedizin.de/resource/supplementary/12891_2014_2400_MOESM4_ESM.pdf/9510014)
Supplement: MOESM4 [file 9510014]

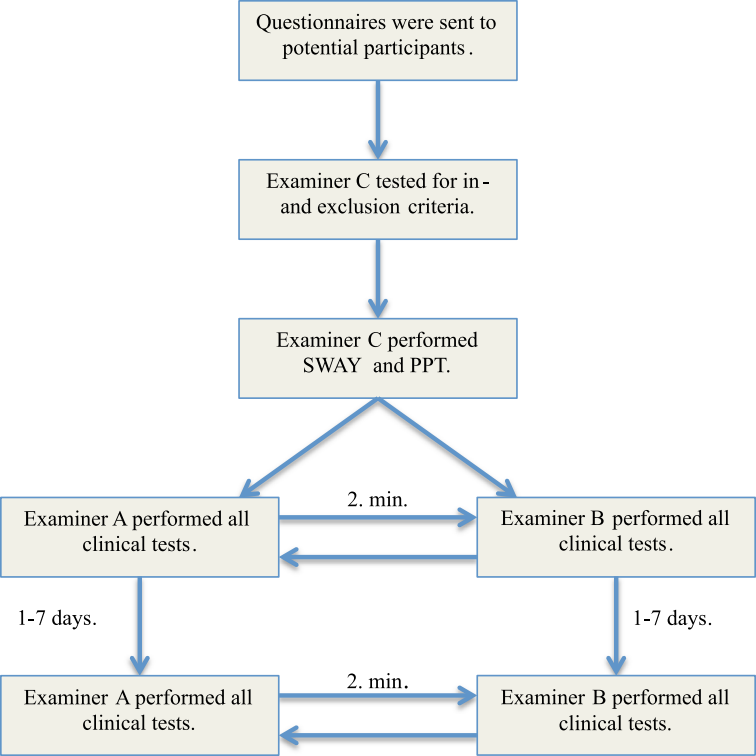

Questionnaires were sent to potential participants .

Examiner C tested for in- and exclusion criteria.

Examiner C performed SWAY and PPT.

Examiner A performed all clinical tests.

Examiner B performed all clinical tests.

2. min.

1-7 days.

1-7 days.

Examiner A performed all clinical tests.

Examiner B performed all clinical tests.

2. min.
